# Supplementary material for: Urinary Cytokines Reflect Renal Inflammation in Acute Tubulointerstitial Nephritis: A Multiplex Bead-Based Assay Assessment
Source: MDPI journal article supplement (doi:10.3390/jcm10132986), 2021-07-04
Supplement: s1 [file s1]

**Supplementary Table S1.** Correlation of the degree of tubulointerstitial infiltrate with the urinary concentration of the cytokines and the analytical variables.

|                                  | <b>Spearman Rho</b> | <b>p-Value</b> |
|----------------------------------|---------------------|----------------|
| <b>ITAC/CXCL11</b>               | 0.574               | <b>0.001*</b>  |
| <b>MIG/CXCL9</b>                 | 0.376               | <b>0.049*</b>  |
| <b>ILB1</b>                      | 0.009               | 0.965          |
| <b>CXCL10</b>                    | 0.614               | <b>0.001*</b>  |
| <b>IL6</b>                       | 0.342               | 0.075          |
| <b>IL17</b>                      | 0.398               | <b>0.041*</b>  |
| <b>TNFalfa</b>                   | 0.318               | 0.099          |
| <b>IFN alfa</b>                  | 0.403               | <b>0.034*</b>  |
| <b>MCP1</b>                      | 0.472               | <b>0.013*</b>  |
| <b>EGF</b>                       | 0.41                | <b>0.03*</b>   |
| <b>Serum creatinine</b>          | 0.045               | 0.82           |
| <b>Serum CRP</b>                 | 0.435               | <b>0.021*</b>  |
| <b>Urinary leukocyte count</b>   | 0.317               | 0.101          |
| <b>Urinary erythrocyte count</b> | 0.011               | 0.957          |
| <b>Blood eosinophil count</b>    | 0.25                | 0.199          |

**Supplementary Table S2.** Value of the cytokines at diagnosis and follow-up.

|                                           | <b>Diagnosis sample</b> | <b>Follow-up sample</b> | <b>p-Value</b> |
|-------------------------------------------|-------------------------|-------------------------|----------------|
| <b>I-TAC/CXCL11</b>                       | 44.34 ± 20.74           | 4.36 ± 2.05             | <b>0.002*</b>  |
| <b>MIG/CXCL9</b>                          | 1044 ± 457.3            | 22.86 ± 8.67            | <b>0.007*</b>  |
| <b>IL1B</b>                               | 5.8 ± 2.99              | 17.73 ± 15.89           | 0.82           |
| <b>CXCL10</b>                             | 441.3 ± 248.7           | 53.02 ± 23.83           | <b>0.02*</b>   |
| <b>IL6</b>                                | 456 ± 408.2             | 18.98 ± 5.72            | 0.1            |
| <b>IL17</b>                               | 11.69 ± 9.86            | 1.48 ± 0.36             | 0.15           |
| <b>TNF alfa</b>                           | 8.65 ± 3.81             | 3.55 ± 0.16             | 0.08           |
| <b>IFN alfa</b>                           | 30.63 ± 26.48           | 2.58 ± 1.51             | 0.3            |
| <b>MCP1</b>                               | 14106 ± 6727            | 6735 ± 3877             | 0.27           |
| <b>EGF</b>                                | 4461 ± 1212             | 11727 ± 2940            | <b>0.016*</b>  |
| <b>Creatinine</b>                         | 291.7 ± 47.67           | 123.8 ± 13.09           | <b>0.002*</b>  |
| <b>CRP (mg/mL)</b>                        | 113.7 ± 42.2            | 5.52 ± 3.21             | <b>0.008*</b>  |
| <b>Urinary leukocyte count (cells/uL)</b> | 756.3 ± 670.1           | 20 ± 12.7               | 0.4            |
| <b>Eosinophil blood count (/10e6)</b>     | 305.5 ± 78.74           | 237.3 ± 58.42           | 0.78           |
